# Supplementary material
Source: PubMed Central journal article supplement (PMC7415717)
Supplement: NIHMS1607269-supplement-1.pdf [file NIHMS1607269-supplement-1.pdf]

**Table S1. Summary of clinical characteristics, colitis onset, and treatment history of patient groups included in scRNA-seq analysis, Related to Figure 1.**

|                                                            | Ipilimumab (or combination) |                  | Control (N=8) |
|------------------------------------------------------------|-----------------------------|------------------|---------------|
|                                                            | Colitis (N=8)               | No Colitis (N=6) |               |
| Age                                                        | 64.2 (49 – 78)              | 59.0 (43 – 75)   | 50.9 (21-70)  |
| M:F                                                        | 4:4                         | 2:1              | 5:3           |
| Malignancy                                                 |                             |                  |               |
| melanoma                                                   | 8                           | 6                | 1             |
| other                                                      | 0                           | 0                | 1             |
| Stage                                                      |                             |                  |               |
| 4                                                          | 8                           | 6                | 0             |
| 3                                                          | 0                           | 0                | 0             |
| 1-2                                                        | 0                           | 0                | 2             |
| Current Immunotherapy                                      |                             |                  |               |
| Ipilimumab                                                 | 2                           | 1                | NA            |
| Ipilimumab + Nivolumab                                     | 6                           | 4                | NA            |
| Prior Immunotherapy                                        |                             |                  |               |
| Ipilimumab                                                 | 0                           | 1                | NA            |
| PD-1/PD-L1                                                 | 6                           | 4                | NA            |
| Ipilimumab + Nivolumab                                     | 0                           | 1                | NA            |
| None                                                       | 2                           | 2                | NA            |
| Average Treatment Cycles (mean +/- sd)                     | 2.4 +/- 0.9                 | 1.4 +/- 0.5      | NA            |
| Time from first treatment to symptoms (days) (mean +/- sd) | 47.4 +/- 24.9               | 18.0 +/- 13.9    | NA            |
| Time from last cycle to symptoms (days) (mean +/- sd)      | 15.6 +/- 5.7                | 10.0 +/- 3.9     | NA            |
| Time from symptom onset to endoscopy (days) (mean +/- sd)  | 4.5 +/- 4.8                 | 3.6 +/- 1.5      | NA            |
| Diagnosis                                                  |                             |                  |               |
| Colitis                                                    | 5                           | 0                | 0             |
| Enterocolitis                                              | 3                           | 0                | 0             |
| Enteritis                                                  | 0                           | 3                | 0             |
| No inflammation                                            | 0                           | 3                | 9             |
| Colitis Severity (MES)                                     | 1.6 (range 1-2)             | 0                | 0             |
| CTCAE Grade                                                | 2.5 (range 1-4)             | 1.2 (range 0-2)  | 0             |
| Steroids prior to endoscopy                                | 1/8                         | 0/6              | 0/9           |
| Response to corticosteroids                                | 3/8                         | 1/3              | NA            |
| Received Infliximab                                        | 4/8                         | 2/3              | NA            |
| Additional irAE                                            | 4/8                         | 3/5              |               |

**Table S2. CPI treatment history for each patient included in scRNA-seq studies, Related to Figure 1.**

| Patient ID | Treatment              | Age  | Sex | Malignancy | Stage | Prior Tx       | Time from last Tx (months) |
|------------|------------------------|------|-----|------------|-------|----------------|----------------------------|
| C1         | Ipilimumab             | 62.0 | F   | Melanoma   | 4     | Pembro         | 0.5                        |
| C2         | Ipilimumab             | 71.2 | F   | Melanoma   | 4     | Pembro         | 7                          |
| C3         | Ipilimumab + Nivolumab | 56.2 | M   | Melanoma   | 4     | Pembro         | 0.5                        |
| C4         | Ipilimumab + Nivolumab | 61.5 | M   | Melanoma   | 4     | Nivo           | 0.5                        |
| C5         | Ipilimumab + Nivolumab | 72.8 | M   | Melanoma   | 4     | none           | NA                         |
| C6         | Ipilimumab + Nivolumab | 78.4 | M   | Melanoma   | 4     | none           | NA                         |
| C7         | Ipilimumab + Nivolumab | 61.6 | F   | Melanoma   | 4     | Pembro         | 24                         |
| C8         | Ipilimumab + Nivolumab | 49.5 | F   | Melanoma   | 4     | Pembro         | 1                          |
|            |                        |      |     |            |       |                |                            |
| NC1        | Ipilimumab + Nivolumab | 43.6 | M   | Melanoma   | 4     | none           | NA                         |
| NC2        | none                   | 68.1 | M   | Melanoma   | 4     | Pembro, Ipi    | 1                          |
| NC3        | Ipilimumab             | 70.5 | F   | Melanoma   | 4     | Pembro, Durva  | 12                         |
| NC4        | Ipilimumab + Nivolumab | 63.7 | M   | Melanoma   | 4     | none           | NA                         |
| NC5        | Ipilimumab + Nivolumab | 58.5 | M   | Melanoma   | 4     | Nivo, Ipi+Nivo | 1                          |
| NC6        | Ipilimumab + Nivolumab | 49.3 | F   | Melanoma   | 4     | Pembro         | 2                          |
|            |                        |      |     |            |       |                |                            |
| CT1        | NA                     | 21.4 | F   | melanoma   | 1A    |                |                            |
| CT2        | NA                     | 61.7 | M   |            |       |                |                            |
| CT3        | NA                     | 50.5 | M   |            |       |                |                            |
| CT4        | NA                     | 43.4 | M   |            |       |                |                            |
| CT5        | NA                     | 70.6 | F   | gastric    | 2     |                |                            |
| CT6        | NA                     | 44.3 | M   |            |       |                |                            |
| CT7        | NA                     | 50.2 | M   |            |       |                |                            |
| CT8        | NA                     | 61.5 | F   |            |       |                |                            |

**Table S3. Characteristics of colitis development and clinical management for each patient included in scRNA-seq studies, Related to Figure 1. \* Patient NC2 had terminated CPI therapy 1 month prior to endoscopy.**

|      | Diagnosis      | Diarrhea Grade (CTCAE) | Mayo Endoscopic Score (MES) | Time from first treatment to symptom onset (days) | Time from most recent cycle to symptom onset (days) | Time from symptom onset to biopsy (days) | Total treatment cycles | Steroids prior to endoscopy | Infliximab Required for Treatment |
|------|----------------|------------------------|-----------------------------|---------------------------------------------------|-----------------------------------------------------|------------------------------------------|------------------------|-----------------------------|-----------------------------------|
| C1   | colitis        | 2                      | 1                           | 8                                                 | 8                                                   | 0                                        | 1                      | no                          | no                                |
| C2   | colitis        | 2                      | 1                           | 57                                                | 15                                                  | 13                                       | 3                      | no                          | no                                |
| C3   | colitis        | 3                      | 2                           | 83                                                | 26                                                  | 6                                        | 3                      | yes                         | yes                               |
| C4   | entero-colitis | 2                      | 2                           | 63                                                | 19                                                  | 2                                        | 3                      | no                          | yes                               |
| C5   | entero-colitis | 1                      | 2                           | 59                                                | 10                                                  | 10                                       | 3                      | no                          | yes                               |
| C6   | entero-colitis | 3                      | 1                           | 56                                                | 15                                                  | 3                                        | 3                      | no                          | no                                |
| C7   | colitis        | 4                      | 2                           | 19                                                | 19                                                  | 1                                        | 1                      | no                          | yes                               |
| C8   | colitis        | 3                      | 2                           | 34                                                | 13                                                  | 1                                        | 2                      | no                          | no                                |
|      |                |                        |                             |                                                   |                                                     |                                          |                        |                             |                                   |
| NC1  | enteritis      | 1                      | 0                           | 35                                                | 16                                                  | 2                                        | 2                      | no                          | no                                |
| NC2* | normal         | 0                      | 0                           | NA                                                | NA                                                  | NA                                       | NA                     | no                          | NA                                |
| NC3  | enteritis      | 2                      | 0                           | 31                                                | 10                                                  | 5                                        | 2                      | no                          | yes                               |
| NC4  | normal         | 1                      | 0                           | 7                                                 | 7                                                   | 5                                        | 1                      | no                          | NA                                |
| NC5  | enteritis      | 1                      | 0                           | 11                                                | 11                                                  | 4                                        | 1                      | no                          | yes                               |
| NC6  | normal         | 2                      | 0                           | 6                                                 | 6                                                   | 2                                        | 1                      | no                          | NA                                |
|      |                |                        |                             |                                                   |                                                     |                                          |                        |                             |                                   |
| CT1  | normal         | 0                      | 0                           | NA                                                | NA                                                  | NA                                       | NA                     | NA                          | NA                                |
| CT2  | normal         | 0                      | 0                           | NA                                                | NA                                                  | NA                                       | NA                     | NA                          | NA                                |
| CT3  | normal         | 0                      | 0                           | NA                                                | NA                                                  | NA                                       | NA                     | NA                          | NA                                |
| CT4  | normal         | 0                      | 0                           | NA                                                | NA                                                  | NA                                       | NA                     | NA                          | NA                                |
| CT5  | normal         | 0                      | 0                           | NA                                                | NA                                                  | NA                                       | NA                     | NA                          | NA                                |
| CT6  | normal         | 0                      | 0                           | NA                                                | NA                                                  | NA                                       | NA                     | NA                          | NA                                |
| CT7  | normal         | 0                      | 0                           | NA                                                | NA                                                  | NA                                       | NA                     | NA                          | NA                                |
| CT8  | normal         | 0                      | 0                           | NA                                                | NA                                                  | NA                                       | NA                     | NA                          | NA                                |

**Table S4. Tumor response rate and durations for CPI-treated patients for each patient included in scRNA-seq studies, Related to Figure 1.** RECIST response definitions: PD= progressive disease, PR= partial response, SD= stable disease. \* Patient NC2 had terminated CPI therapy 1 month prior to endoscopy.

|     | Diagnosis      | RECIST response (best response at time of endoscopy) | Overall Survival (months) from CPI initiation to date of death | Current status (April 2020) |
|-----|----------------|------------------------------------------------------|----------------------------------------------------------------|-----------------------------|
| C1  | colitis        | PD                                                   | 4.2                                                            | deceased                    |
| C2  | colitis        | PR                                                   | 13.0                                                           | deceased                    |
| C3  | colitis        | PR                                                   | 17.5                                                           | alive                       |
| C4  | entero-colitis | PD                                                   | 6.1                                                            | deceased                    |
| C5  | entero-colitis | SD                                                   | 13.9                                                           | alive                       |
| C6  | entero-colitis | PR                                                   | 13.2                                                           | alive                       |
| C7  | colitis        | PD                                                   | 5.7                                                            | deceased                    |
| C8  | colitis        | PD                                                   | 11.1                                                           | deceased                    |
|     |                |                                                      |                                                                |                             |
| NC1 | enteritis      | PR                                                   | 17.5                                                           | alive                       |
| NC2 | normal         | *                                                    | *                                                              | alive                       |
| NC3 | enteritis      | PD                                                   | 15.1                                                           | alive                       |
| NC4 | normal         | PR                                                   | 12.6                                                           | alive                       |
| NC5 | enteritis      | PD                                                   | 12.3                                                           | deceased                    |
| NC6 | normal         | PD                                                   | 10.4                                                           | alive                       |
