# Supplementary material
Source: PubMed Central journal article supplement (PMC7415717)

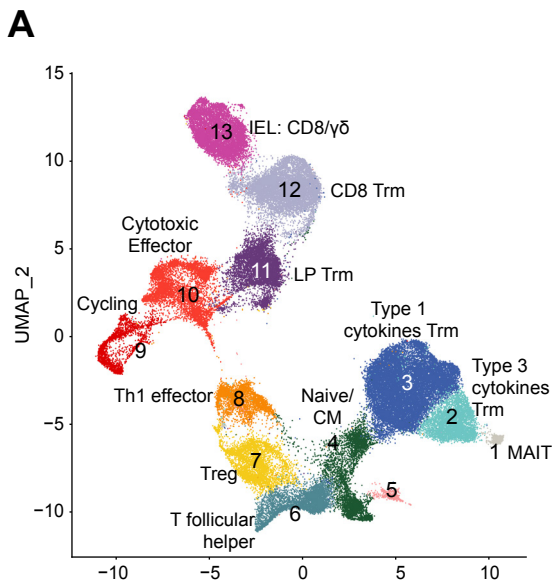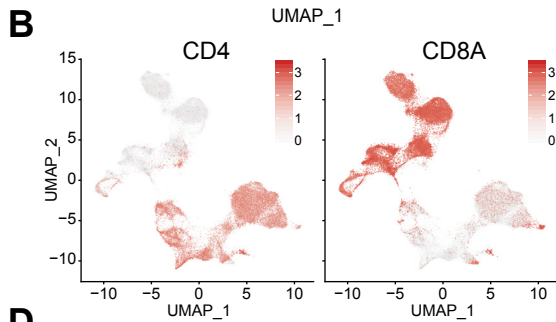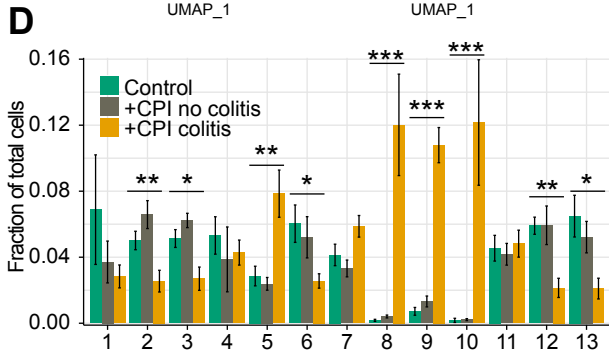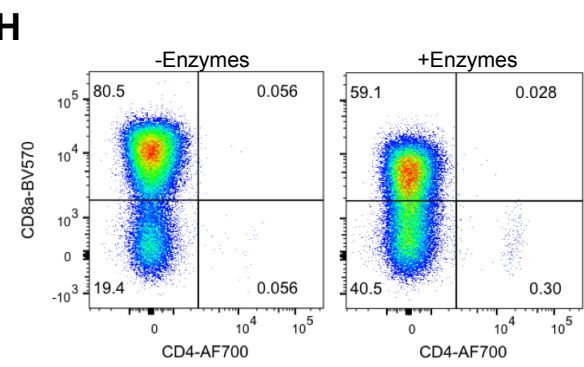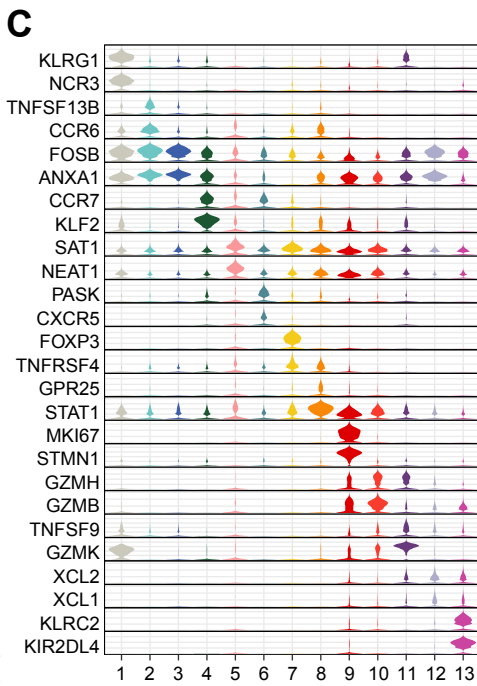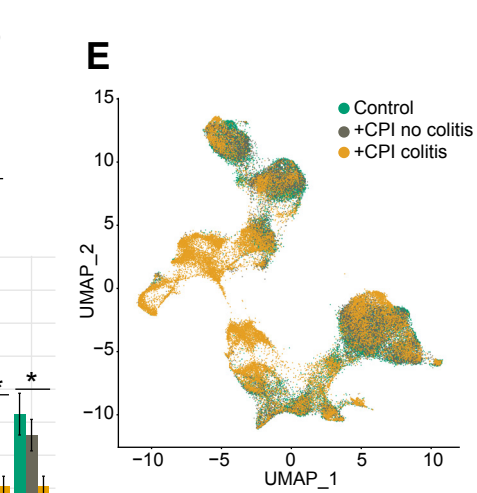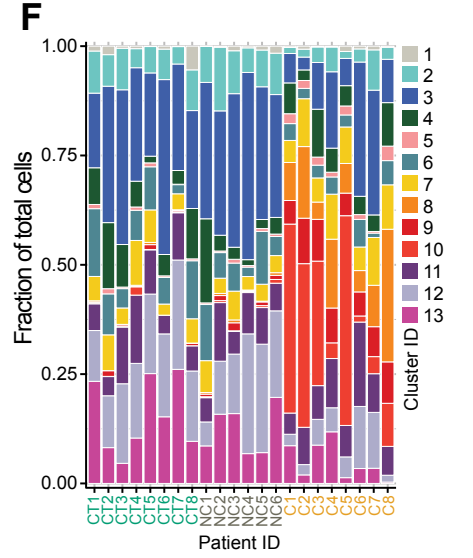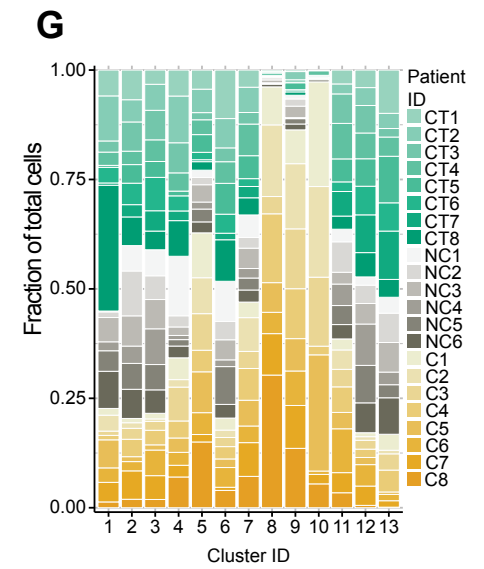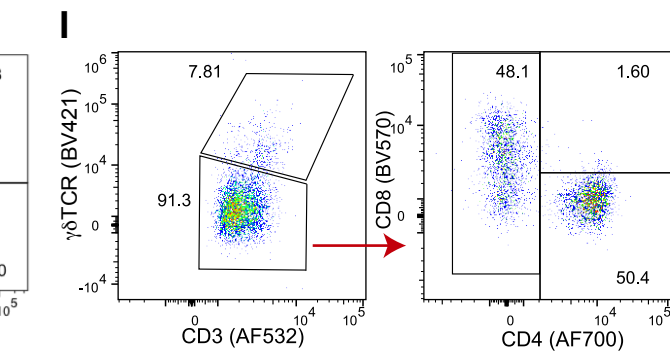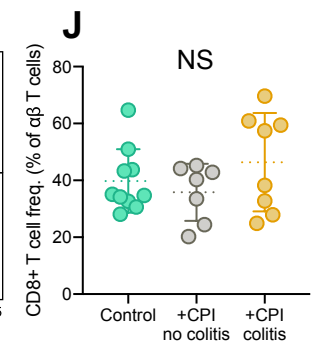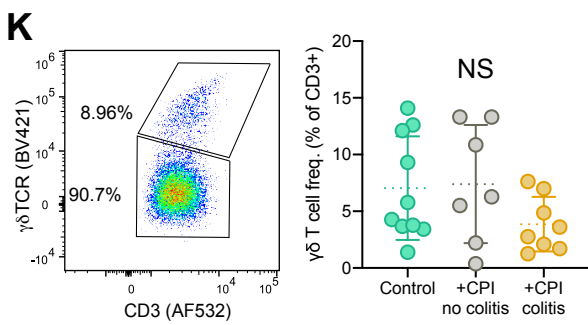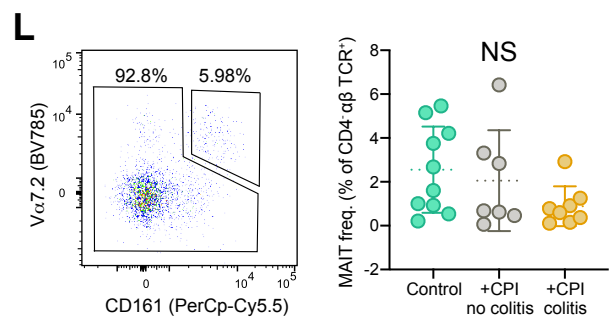

Supplement: NIHMS1607269-supplement-3.pdf [file NIHMS1607269-supplement-3.pdf]

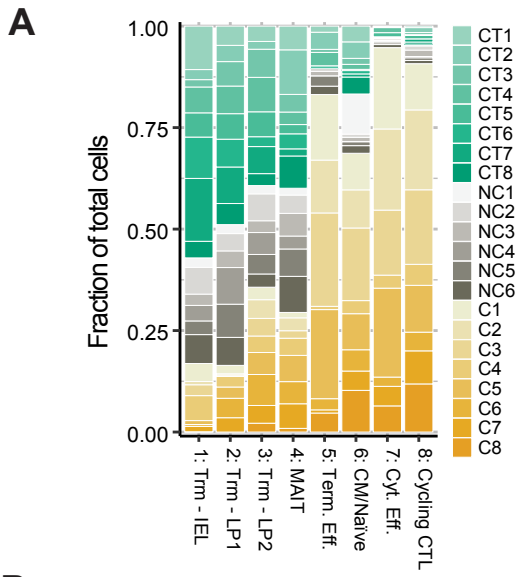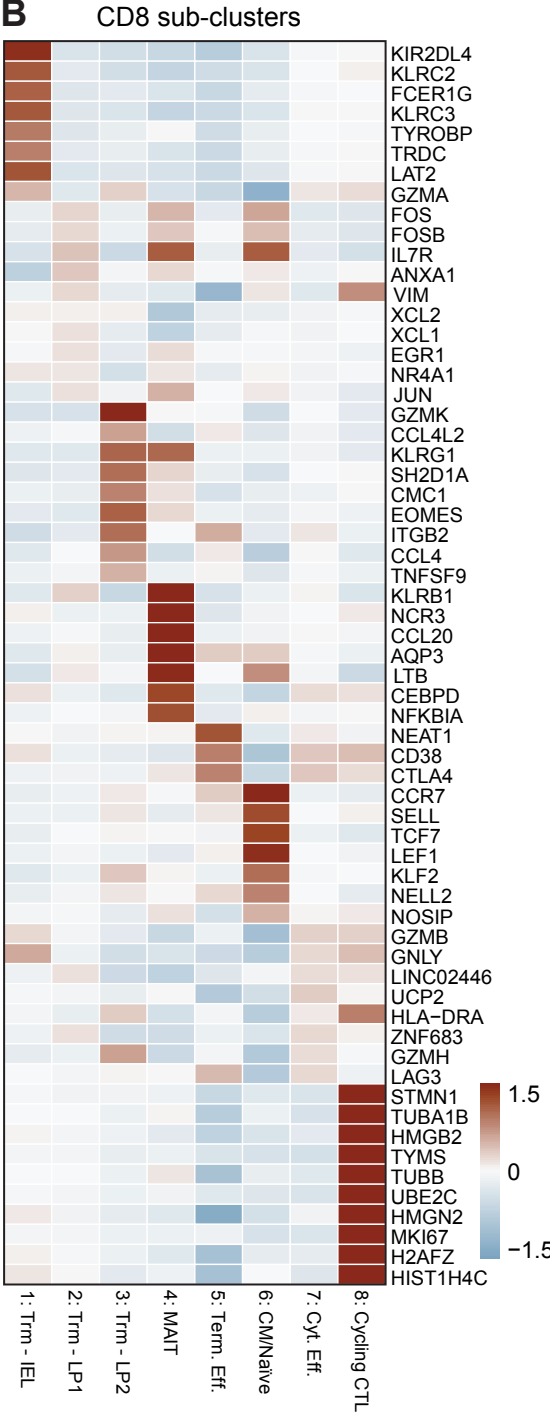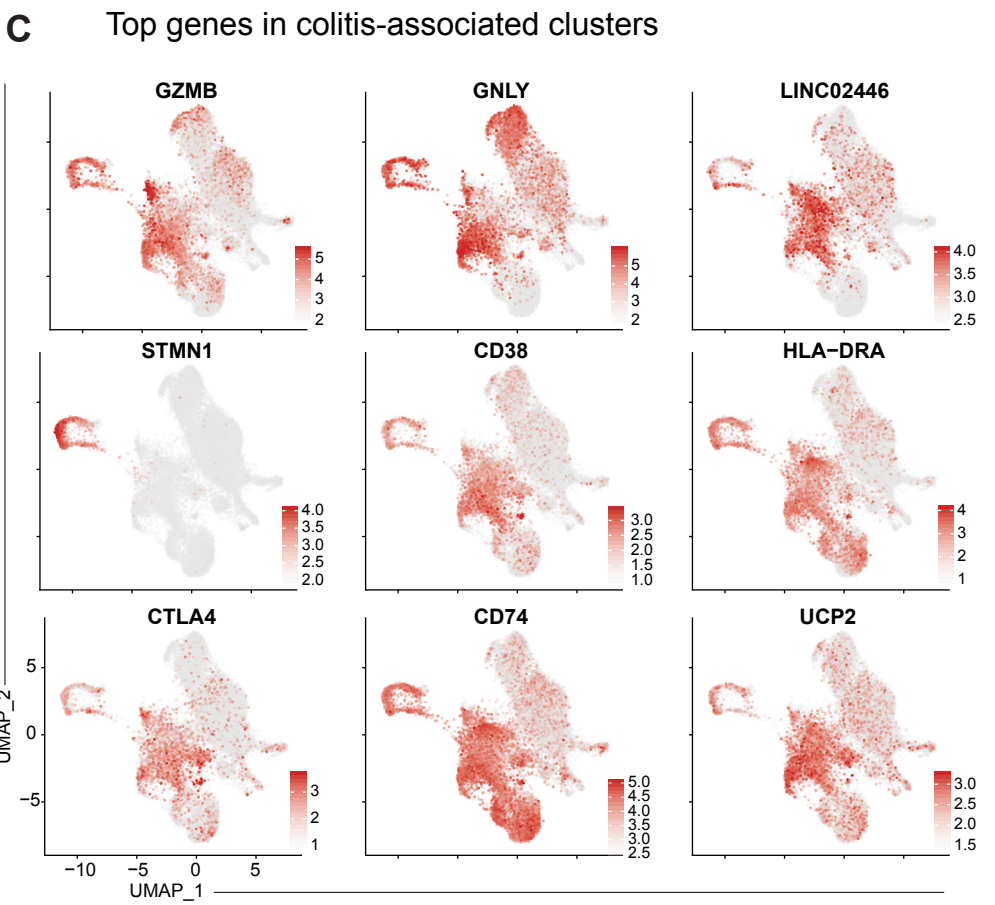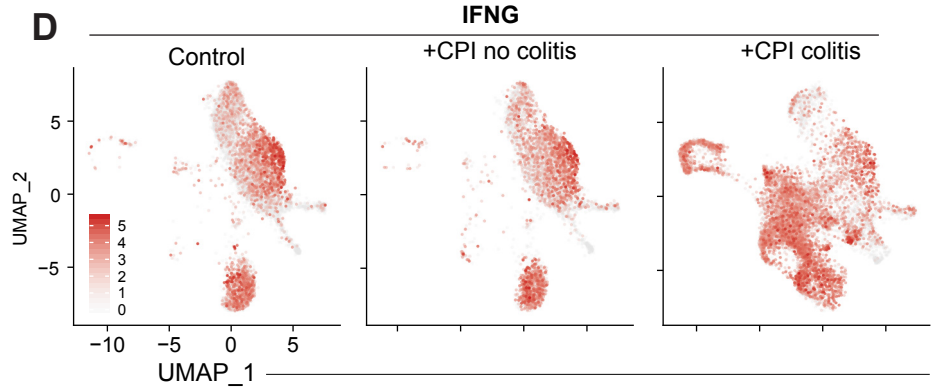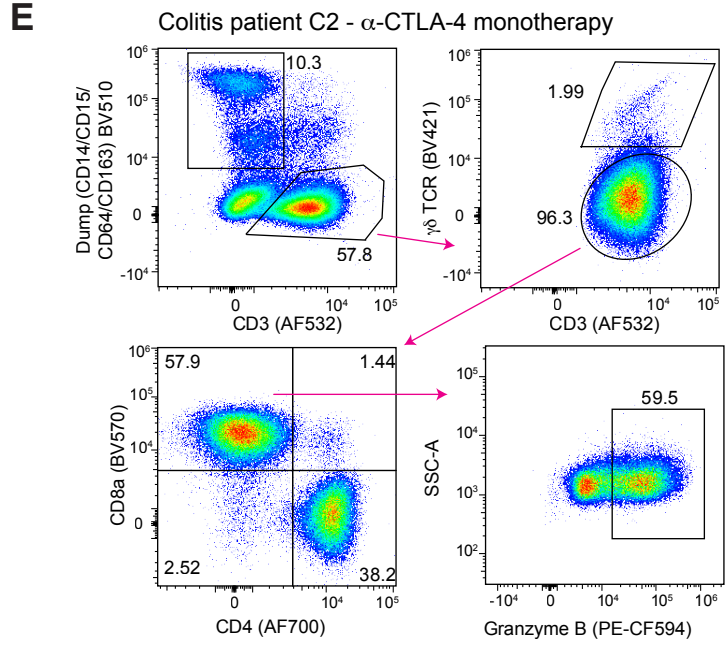

Supplement: NIHMS1607269-supplement-4.pdf [file NIHMS1607269-supplement-4.pdf]

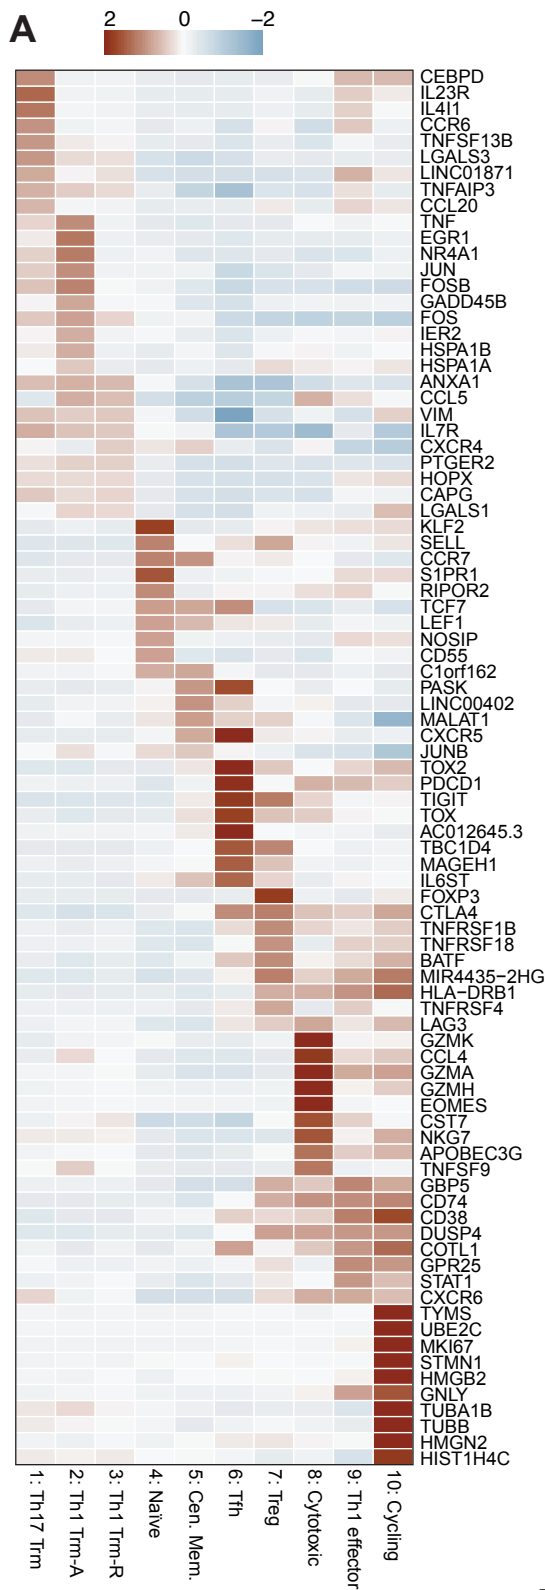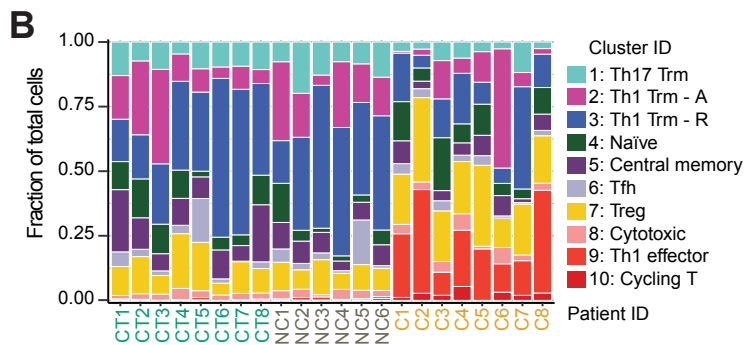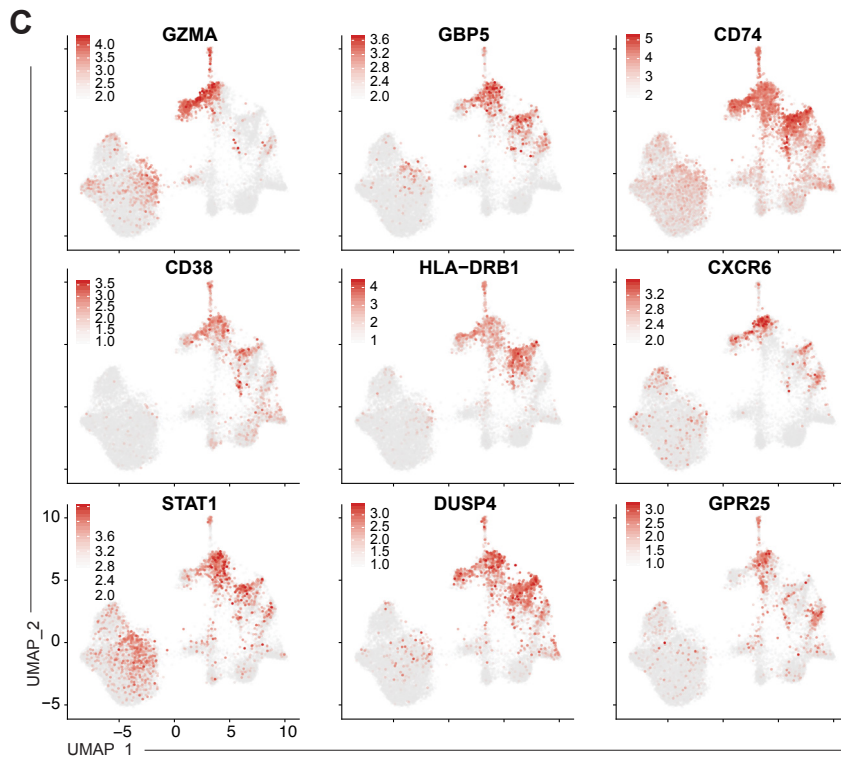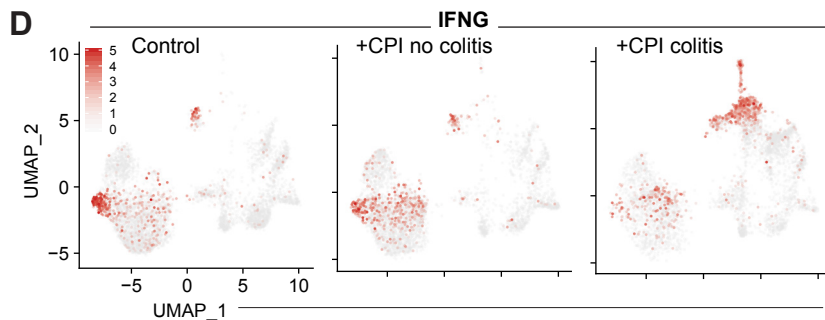

**E** Colitis patient C2 -  $\alpha$ -CTLA-4 monotherapy

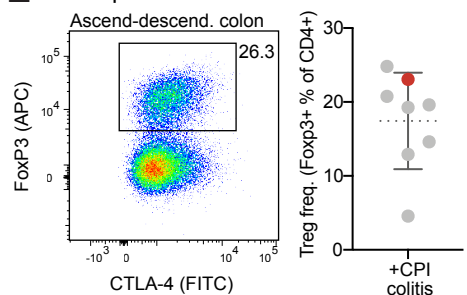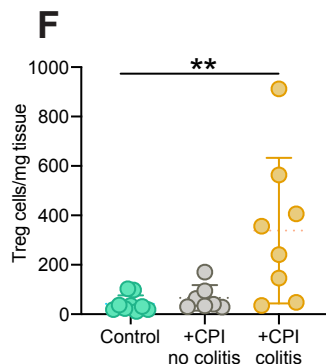

**G** Treg sub-clustering

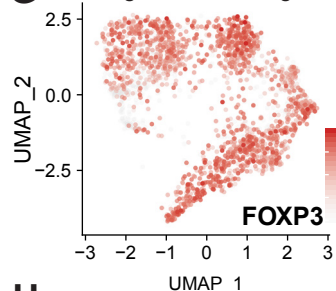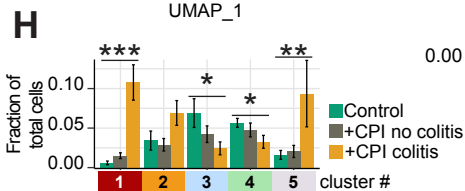

**I**

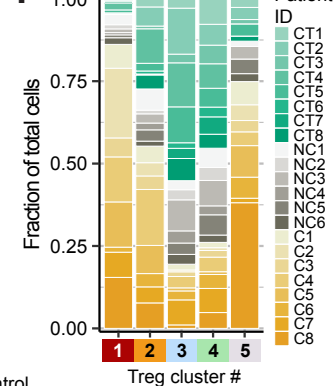

Supplement: NIHMS1607269-supplement-5.pdf [file NIHMS1607269-supplement-5.pdf]

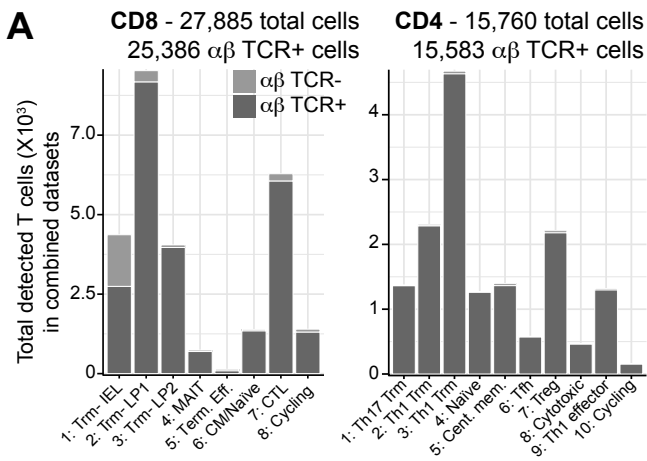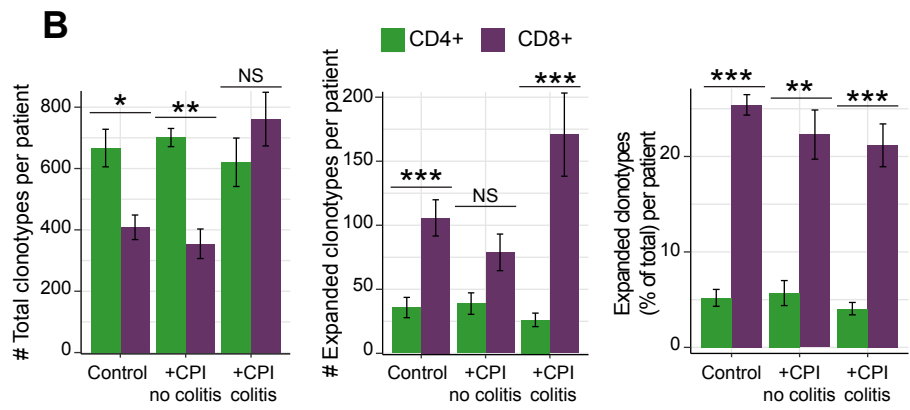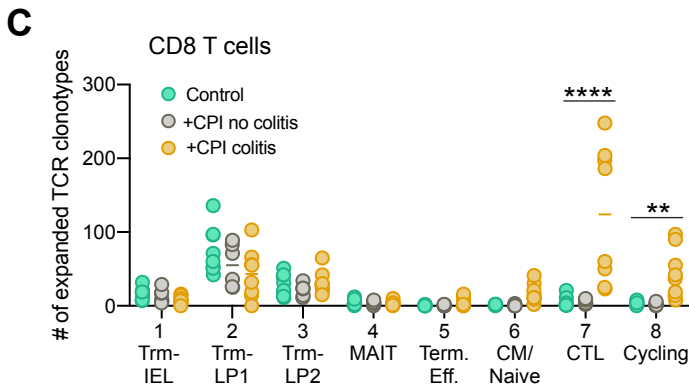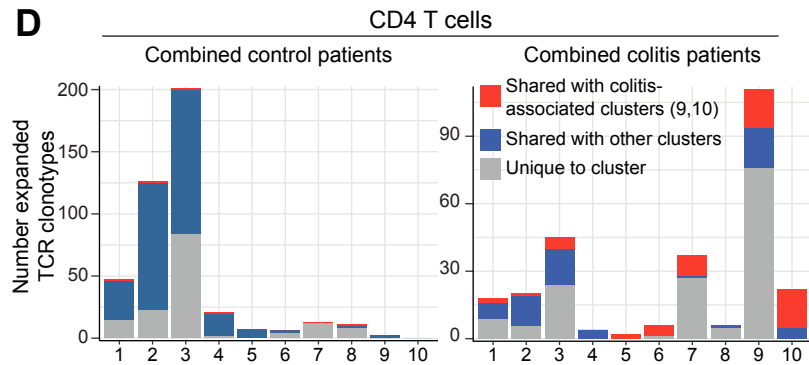

**E** **CD4 T cells**

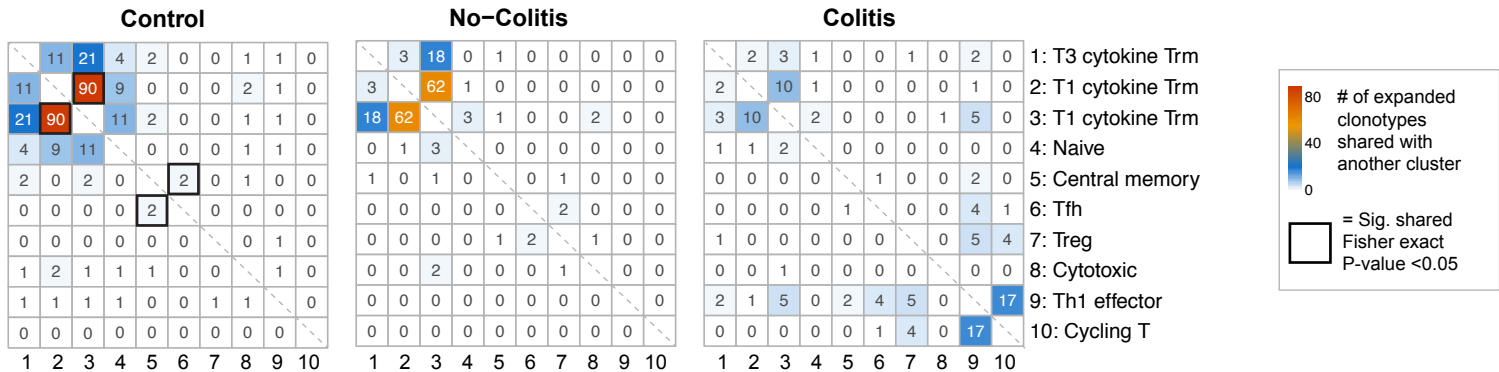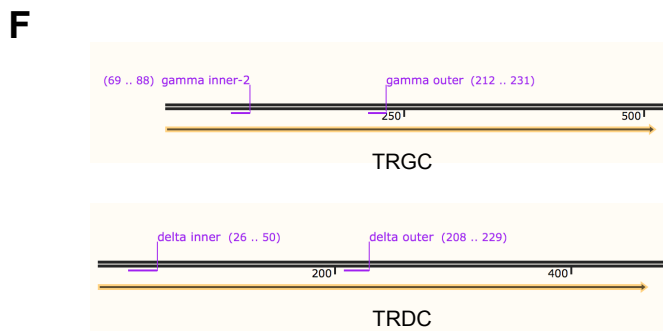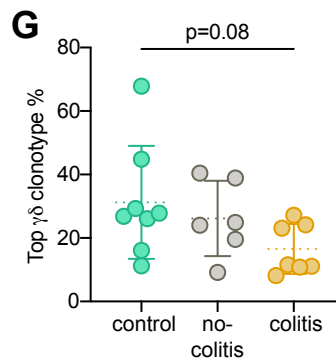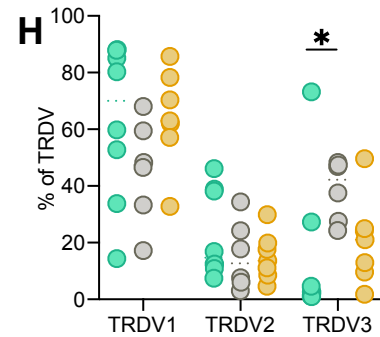

Supplement: NIHMS1607269-supplement-6.pdf [file NIHMS1607269-supplement-6.pdf]

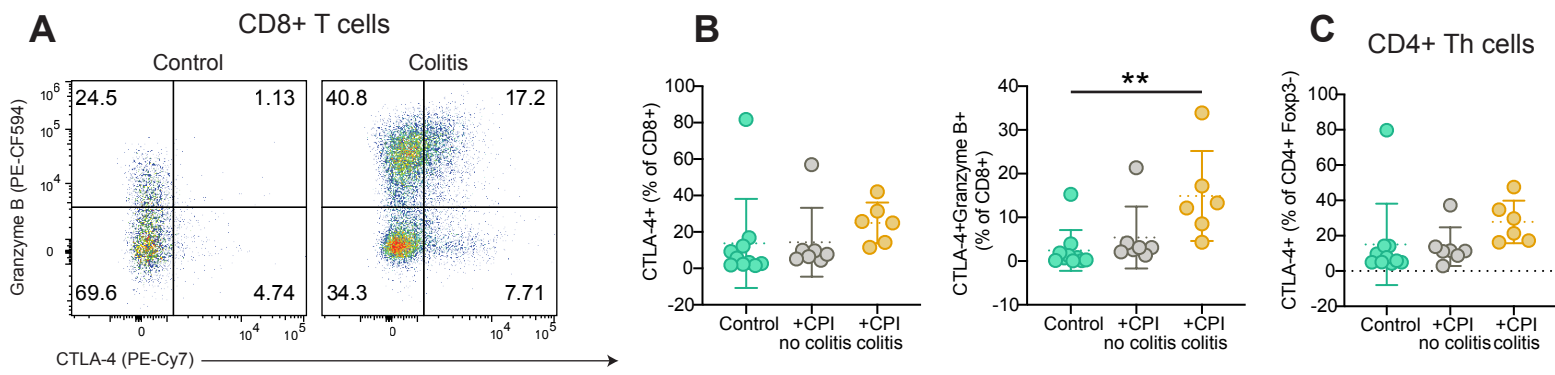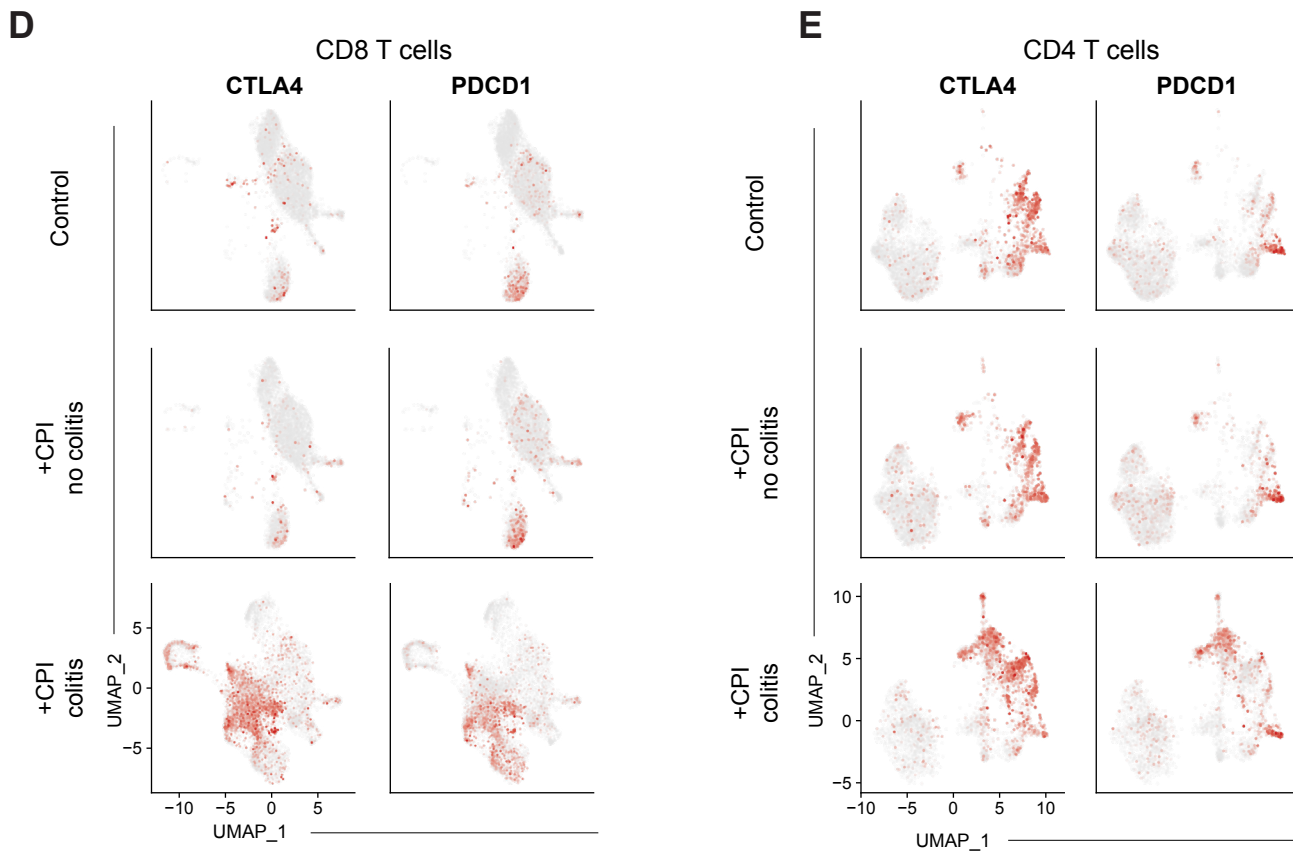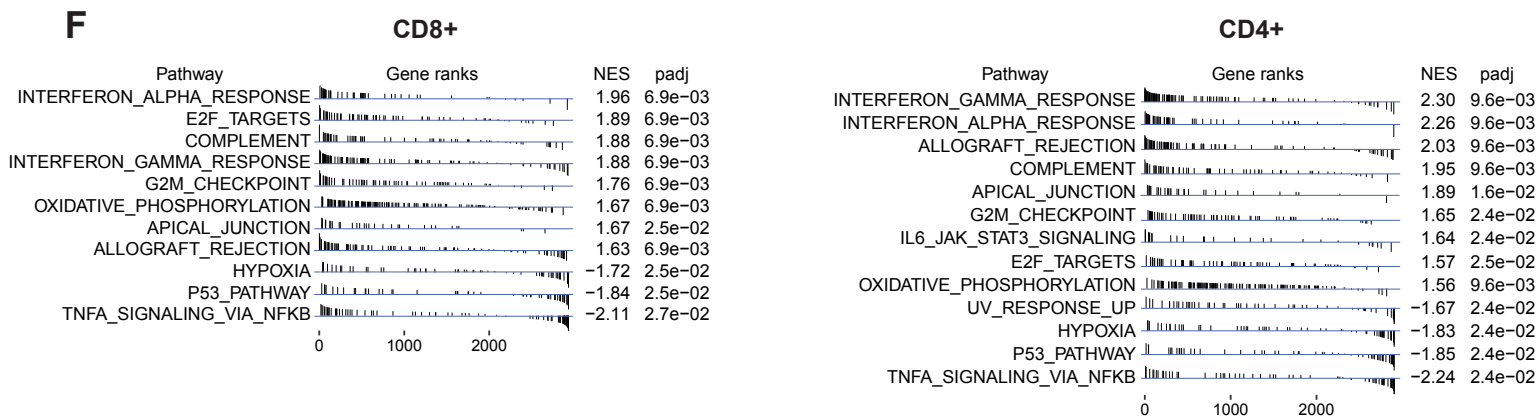

Supplement: NIHMS1607269-supplement-7.pdf [file NIHMS1607269-supplement-7.pdf]

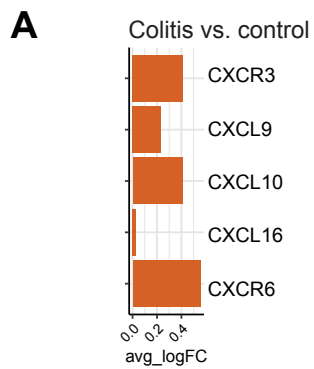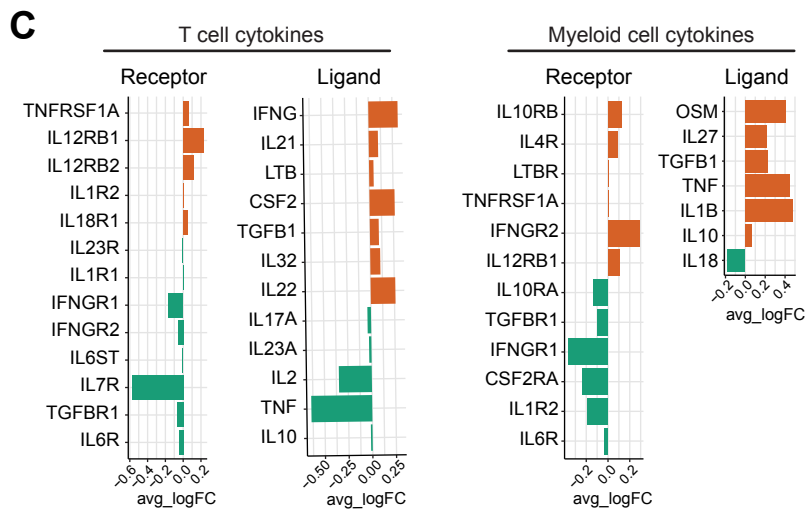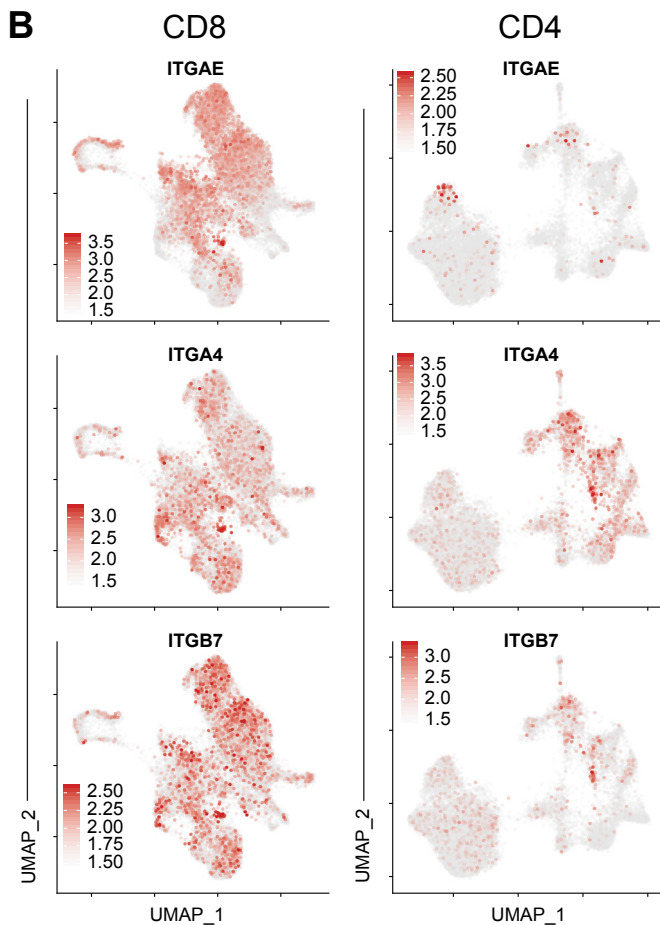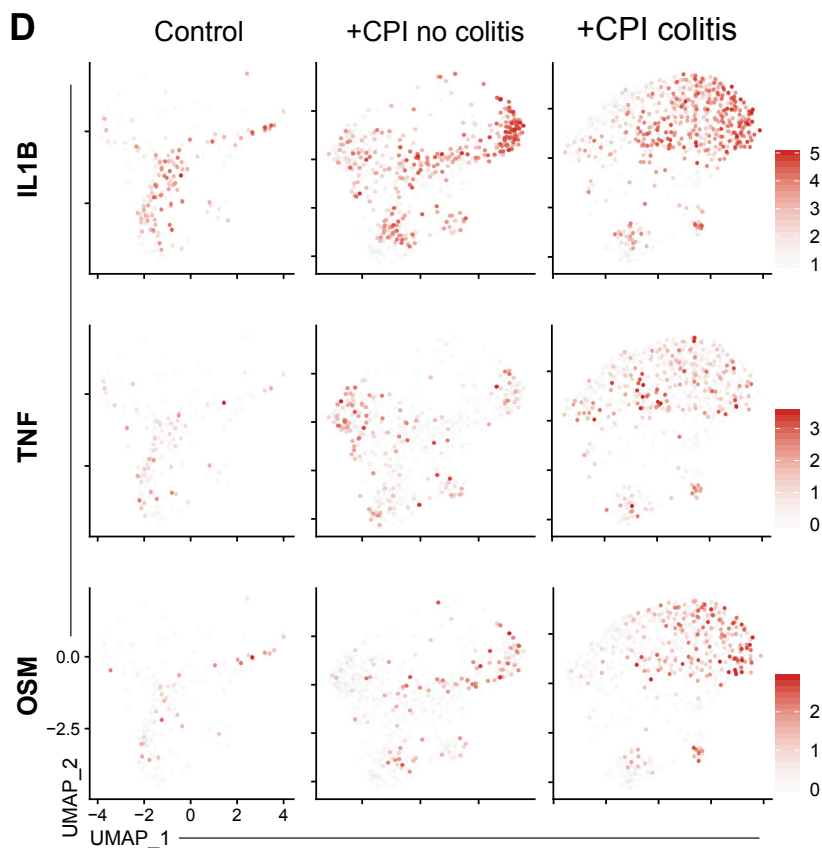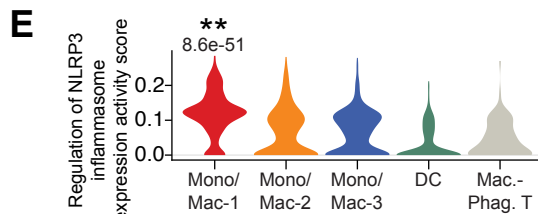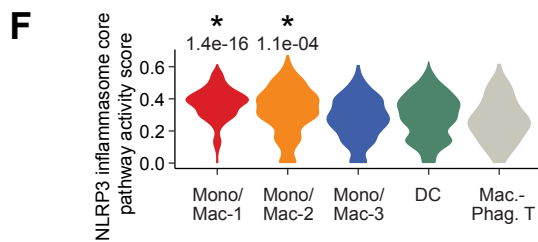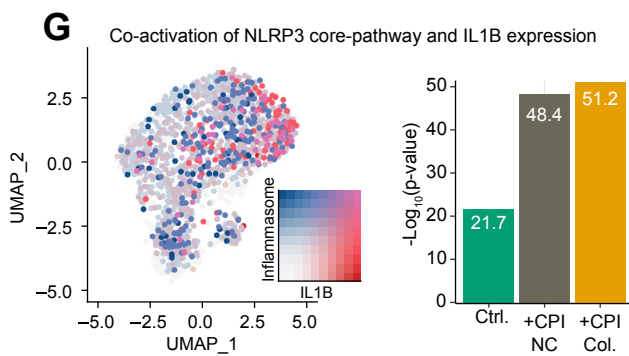

Supplement: NIHMS1607269-supplement-8.pdf [file NIHMS1607269-supplement-8.pdf]
